# Supplementary material for: La presunción de onerosidad en el Impuesto sobre la Renta de las Personas Físicas y en el Impuesto sobre Sociedades
Source: Royal Society of Chemistry journal article supplement (doi:10.1039/c7mb00450h), 1983-01-01
Supplement: c7mb00450h2.pdf [file c7mb00450h2.pdf]

**Table S1 caption:**

The complete lists of up and down regulated genes in each of cancers (GC, CRC and HCC), common between two cancers and common between three cancers. The highlighted genes are those that are common between three cancers.

**Table S2 caption:**

List of 99 biological pathways common between 4 miRNAs.
